# Supplementary material
Source: MDPI journal article supplement (https://www.mdpi.com/2073-4395/13/12/3054)
Supplement: s1 [file s1]

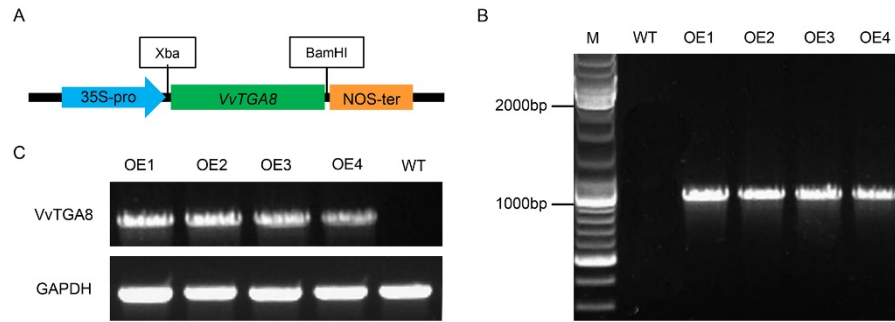

Figure S2. Identification of *Solanum lycopersicum* overexpression lines of *VvTGA8* gene. (A) Diagram of the *VvTGA8*-overexpressing transformation vector pBI121:*VvTGA8*. (B) PCR products targeting a fragment of *VvTGA8* amplified from DNA extracted from *VvTGA8*-overexpression lines. (C) RT-PCR amplification of *VvTGA8* cDNA in the transgenic *S. lycopersicum* lines. GAPDH is shown as a control. Error bars represent standard errors of three biological replicates, \*\*indicates statistical significance ( $P < 0.01$ ), according to unpaired Student's t-tests.
