# Supplementary material
Source: MDPI journal article supplement (https://www.mdpi.com/2073-4395/13/12/3054)
Supplement: s1 [file s1]

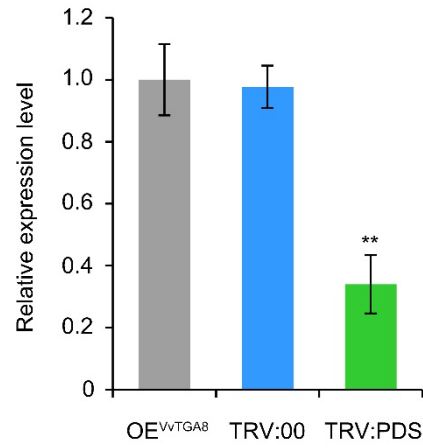

Figure S3. Expression of *PDS* gene in wild type (WT), control plants (TRV:00), and *PDS*-silenced plants as determined by RT-qPCR. WT represent *VvTGA8*-overexpressing (OE<sup>*VvTGA8*</sup>) line of *S. lycopersicum*. Error bars calculated based on three biological replicates using standard deviation.

\*\* indicates significant difference ( $P < 0.01$ ), according to unpaired Student's t-tests.
